# Supplementary material for: A Senescence-Like Cellular Response Inhibits Bovine Ephemeral Fever Virus Proliferation
Source: MDPI journal article supplement (doi:10.3390/vaccines9060601), 2021-06-04
Supplement: s1 [file s1]

**Supplementary figure1.** Cell morphology and SA- $\beta$ -gal stained images of 36 BHK-21 subclones.

| Isolation labels | Cell Morphology                                                                     | SA- $\beta$ -gal Staining                                                            |
|------------------|-------------------------------------------------------------------------------------|--------------------------------------------------------------------------------------|
| A1               | 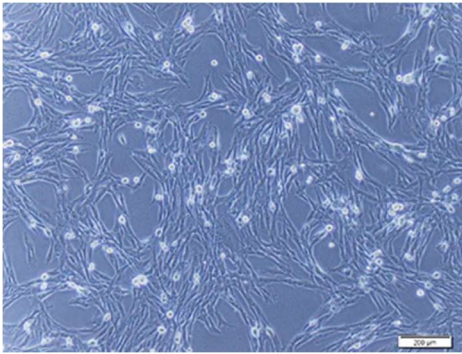   |    |
| A2               |   |   |
| A4               |  |  |
| A5               |  |  |

|           |                                                                                     |                                                                                      |
|-----------|-------------------------------------------------------------------------------------|--------------------------------------------------------------------------------------|
| <b>A6</b> | 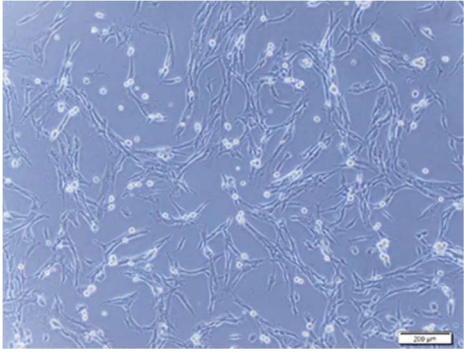   |    |
| <b>B1</b> |    |    |
| <b>B2</b> |   |   |
| <b>B3</b> |  |  |



|           |                                                                                                                                                                                                                                                                           |                                                                                                                                                                                                                                                                             |
|-----------|---------------------------------------------------------------------------------------------------------------------------------------------------------------------------------------------------------------------------------------------------------------------------|-----------------------------------------------------------------------------------------------------------------------------------------------------------------------------------------------------------------------------------------------------------------------------|
| <b>B5</b> | 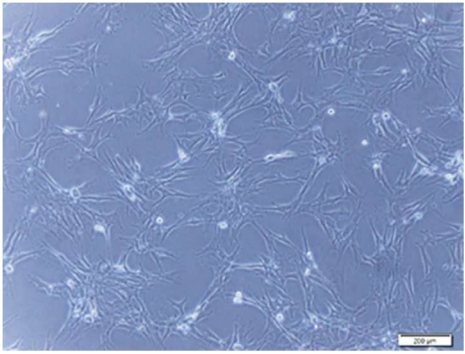 <p>Micrograph showing a dense population of B5 cells. The cells are elongated and spindle-shaped, with prominent nuclei. A scale bar in the bottom right corner indicates 200 μm.</p>   |  <p>Micrograph showing a sparse population of B5 cells. The cells are elongated and spindle-shaped, with prominent nuclei. A scale bar in the bottom right corner indicates 200 μm.</p>   |
| <b>B6</b> |  <p>Micrograph showing a dense population of B6 cells. The cells are elongated and spindle-shaped, with prominent nuclei. A scale bar in the bottom right corner indicates 200 μm.</p>   |  <p>Micrograph showing a sparse population of B6 cells. The cells are elongated and spindle-shaped, with prominent nuclei. A scale bar in the bottom right corner indicates 200 μm.</p>   |
| <b>C2</b> |  <p>Micrograph showing a dense population of C2 cells. The cells are elongated and spindle-shaped, with prominent nuclei. A scale bar in the bottom right corner indicates 200 μm.</p>  |  <p>Micrograph showing a sparse population of C2 cells. The cells are elongated and spindle-shaped, with prominent nuclei. A scale bar in the bottom right corner indicates 200 μm.</p>  |
| <b>C4</b> |  <p>Micrograph showing a dense population of C4 cells. The cells are elongated and spindle-shaped, with prominent nuclei. A scale bar in the bottom right corner indicates 200 μm.</p> |  <p>Micrograph showing a sparse population of C4 cells. The cells are elongated and spindle-shaped, with prominent nuclei. A scale bar in the bottom right corner indicates 200 μm.</p> |

|           |                                                                                                                                                                                                                                                                         |                                                                                                                                                                                                                                                                          |
|-----------|-------------------------------------------------------------------------------------------------------------------------------------------------------------------------------------------------------------------------------------------------------------------------|--------------------------------------------------------------------------------------------------------------------------------------------------------------------------------------------------------------------------------------------------------------------------|
| <b>C5</b> | 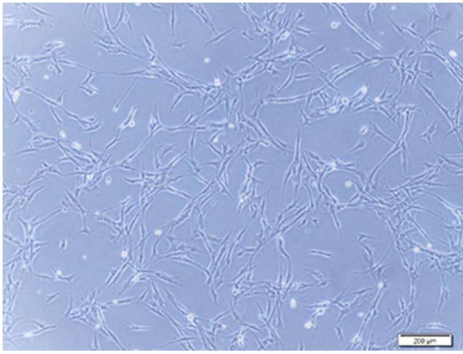 <p>Micrograph showing a dense population of elongated, spindle-shaped cells (likely fibroblasts) on a blue background. A scale bar in the bottom right corner indicates 200 μm.</p>   |  <p>Micrograph showing a dense population of elongated, spindle-shaped cells (likely fibroblasts) on a blue background. A scale bar in the bottom right corner indicates 200 μm.</p>   |
| <b>C6</b> |  <p>Micrograph showing a dense population of elongated, spindle-shaped cells (likely fibroblasts) on a blue background. A scale bar in the bottom right corner indicates 200 μm.</p>   |  <p>Micrograph showing a dense population of elongated, spindle-shaped cells (likely fibroblasts) on a blue background. A scale bar in the bottom right corner indicates 200 μm.</p>   |
| <b>D1</b> |  <p>Micrograph showing a dense population of elongated, spindle-shaped cells (likely fibroblasts) on a blue background. A scale bar in the bottom right corner indicates 200 μm.</p>  |  <p>Micrograph showing a dense population of elongated, spindle-shaped cells (likely fibroblasts) on a blue background. A scale bar in the bottom right corner indicates 200 μm.</p>  |
| <b>D2</b> |  <p>Micrograph showing a dense population of elongated, spindle-shaped cells (likely fibroblasts) on a blue background. A scale bar in the bottom right corner indicates 200 μm.</p> |  <p>Micrograph showing a dense population of elongated, spindle-shaped cells (likely fibroblasts) on a blue background. A scale bar in the bottom right corner indicates 200 μm.</p> |



|           |                                                                                     |                                                                                      |
|-----------|-------------------------------------------------------------------------------------|--------------------------------------------------------------------------------------|
| <b>D3</b> | 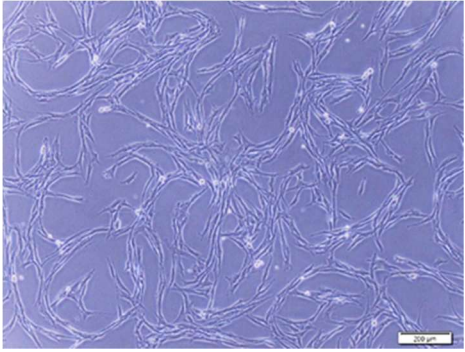   |    |
| <b>D4</b> |    |    |
| <b>D5</b> |   |   |
| <b>D6</b> |  |  |



|      |                                                                                     |                                                                                      |
|------|-------------------------------------------------------------------------------------|--------------------------------------------------------------------------------------|
| A1-2 | 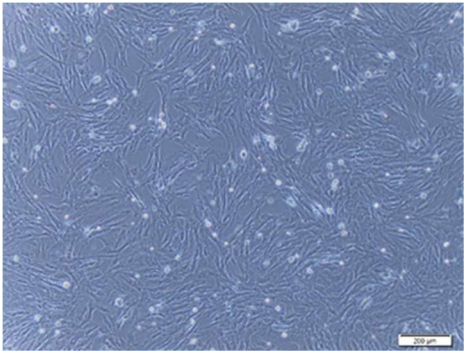   |    |
| A2-2 |    |    |
| A3-2 |   |   |
| A4-2 |  |  |

|             |                                                                                     |                                                                                      |
|-------------|-------------------------------------------------------------------------------------|--------------------------------------------------------------------------------------|
| <b>A5-2</b> | 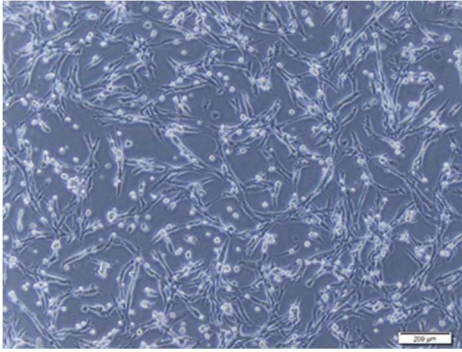   |    |
| <b>A6-2</b> |    |    |
| <b>B1-2</b> |   |   |
| <b>B2-2</b> |  |  |



|             |                                                                                                                                                                                                                                                                                   |                                                                                                                                                                                                                                                                                    |
|-------------|-----------------------------------------------------------------------------------------------------------------------------------------------------------------------------------------------------------------------------------------------------------------------------------|------------------------------------------------------------------------------------------------------------------------------------------------------------------------------------------------------------------------------------------------------------------------------------|
| <b>B3-2</b> | 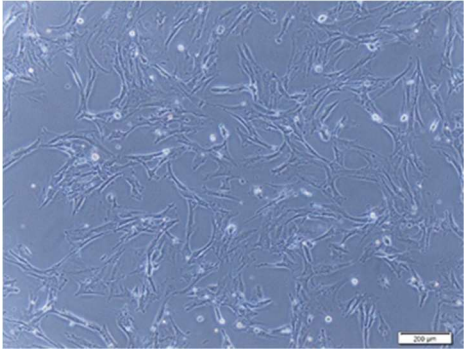 Micrograph showing a dense population of B3-2 cells. The cells are elongated and spindle-shaped, with some showing prominent nuclei. A scale bar in the bottom right corner indicates 200 μm.   |  Micrograph showing a dense population of B3-2 cells. The cells are elongated and spindle-shaped, with some showing prominent nuclei. A scale bar in the bottom right corner indicates 200 μm.   |
| <b>B4-2</b> |  Micrograph showing a dense population of B4-2 cells. The cells are elongated and spindle-shaped, with some showing prominent nuclei. A scale bar in the bottom right corner indicates 200 μm.   |  Micrograph showing a dense population of B4-2 cells. The cells are elongated and spindle-shaped, with some showing prominent nuclei. A scale bar in the bottom right corner indicates 200 μm.   |
| <b>B6-2</b> |  Micrograph showing a dense population of B6-2 cells. The cells are elongated and spindle-shaped, with some showing prominent nuclei. A scale bar in the bottom right corner indicates 200 μm.  |  Micrograph showing a dense population of B6-2 cells. The cells are elongated and spindle-shaped, with some showing prominent nuclei. A scale bar in the bottom right corner indicates 200 μm.  |
| <b>D1-2</b> |  Micrograph showing a dense population of D1-2 cells. The cells are elongated and spindle-shaped, with some showing prominent nuclei. A scale bar in the bottom right corner indicates 200 μm. |  Micrograph showing a dense population of D1-2 cells. The cells are elongated and spindle-shaped, with some showing prominent nuclei. A scale bar in the bottom right corner indicates 200 μm. |



|             |                                                                                                                                                                                                                                                                                                     |                                                                                                                                                                                                                                                                                                       |
|-------------|-----------------------------------------------------------------------------------------------------------------------------------------------------------------------------------------------------------------------------------------------------------------------------------------------------|-------------------------------------------------------------------------------------------------------------------------------------------------------------------------------------------------------------------------------------------------------------------------------------------------------|
| <b>D2-2</b> | 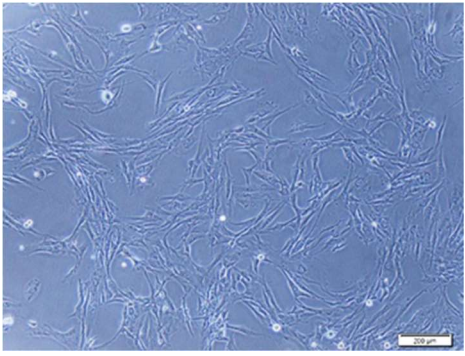 Micrograph showing a dense population of elongated, spindle-shaped cells with prominent nuclei, typical of fibroblasts or epithelial cells in culture. A scale bar in the bottom right corner indicates 200 μm.   |  Micrograph showing a sparse population of elongated, spindle-shaped cells with prominent nuclei, typical of fibroblasts or epithelial cells in culture. A scale bar in the bottom right corner indicates 200 μm.   |
| <b>D3-2</b> |  Micrograph showing a dense population of elongated, spindle-shaped cells with prominent nuclei, typical of fibroblasts or epithelial cells in culture. A scale bar in the bottom right corner indicates 200 μm.   |  Micrograph showing a dense population of elongated, spindle-shaped cells with prominent nuclei, typical of fibroblasts or epithelial cells in culture. A scale bar in the bottom right corner indicates 200 μm.    |
| <b>D4-2</b> |  Micrograph showing a dense population of elongated, spindle-shaped cells with prominent nuclei, typical of fibroblasts or epithelial cells in culture. A scale bar in the bottom right corner indicates 200 μm.  |  Micrograph showing a dense population of elongated, spindle-shaped cells with prominent nuclei, typical of fibroblasts or epithelial cells in culture. A scale bar in the bottom right corner indicates 200 μm.   |
| <b>D5-2</b> |  Micrograph showing a dense population of elongated, spindle-shaped cells with prominent nuclei, typical of fibroblasts or epithelial cells in culture. A scale bar in the bottom right corner indicates 200 μm. |  Micrograph showing a sparse population of elongated, spindle-shaped cells with prominent nuclei, typical of fibroblasts or epithelial cells in culture. A scale bar in the bottom right corner indicates 200 μm. |
