# Supplementary material for: A Senescence-Like Cellular Response Inhibits Bovine Ephemeral Fever Virus Proliferation
Source: MDPI journal article supplement (doi:10.3390/vaccines9060601), 2021-06-04
Supplement: s1 [file s1]

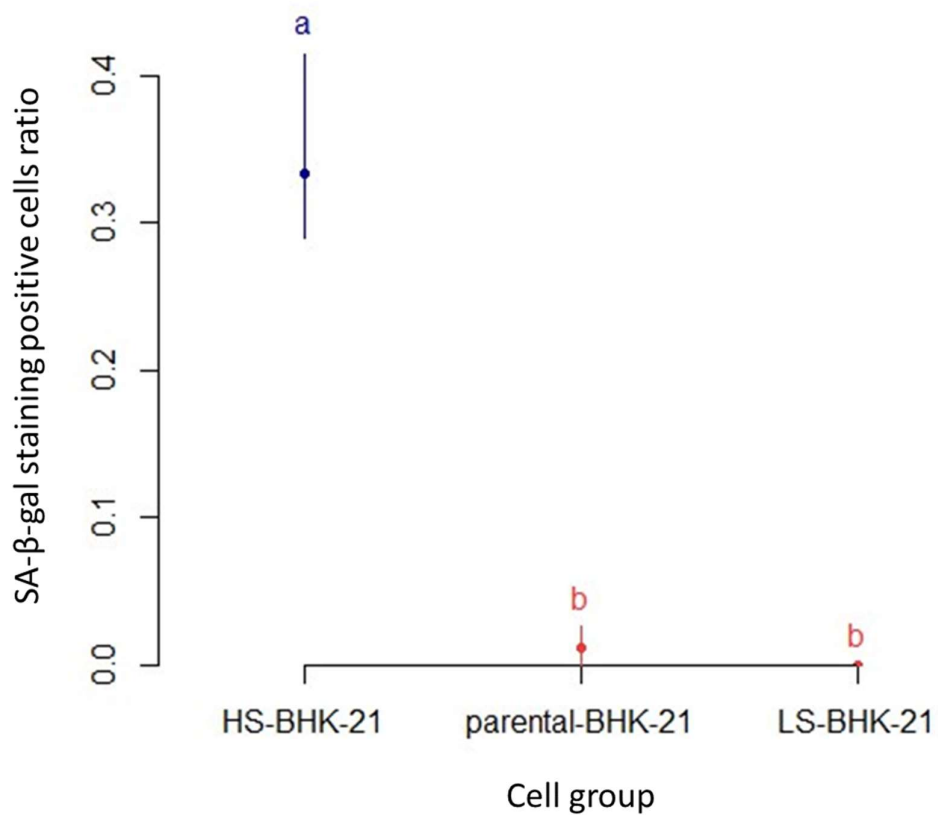

**Supplementary figure 2. The SA-β-gal staining positive cell ratio in parental and subclonal BHK-21 cells.** The cells were stained and image recorded. The ratio was calculated by all cells and positive cells counting in the images.
