# Supplementary material for: A Senescence-Like Cellular Response Inhibits Bovine Ephemeral Fever Virus Proliferation
Source: MDPI journal article supplement (doi:10.3390/vaccines9060601), 2021-06-04
Supplement: s1 [file s1]

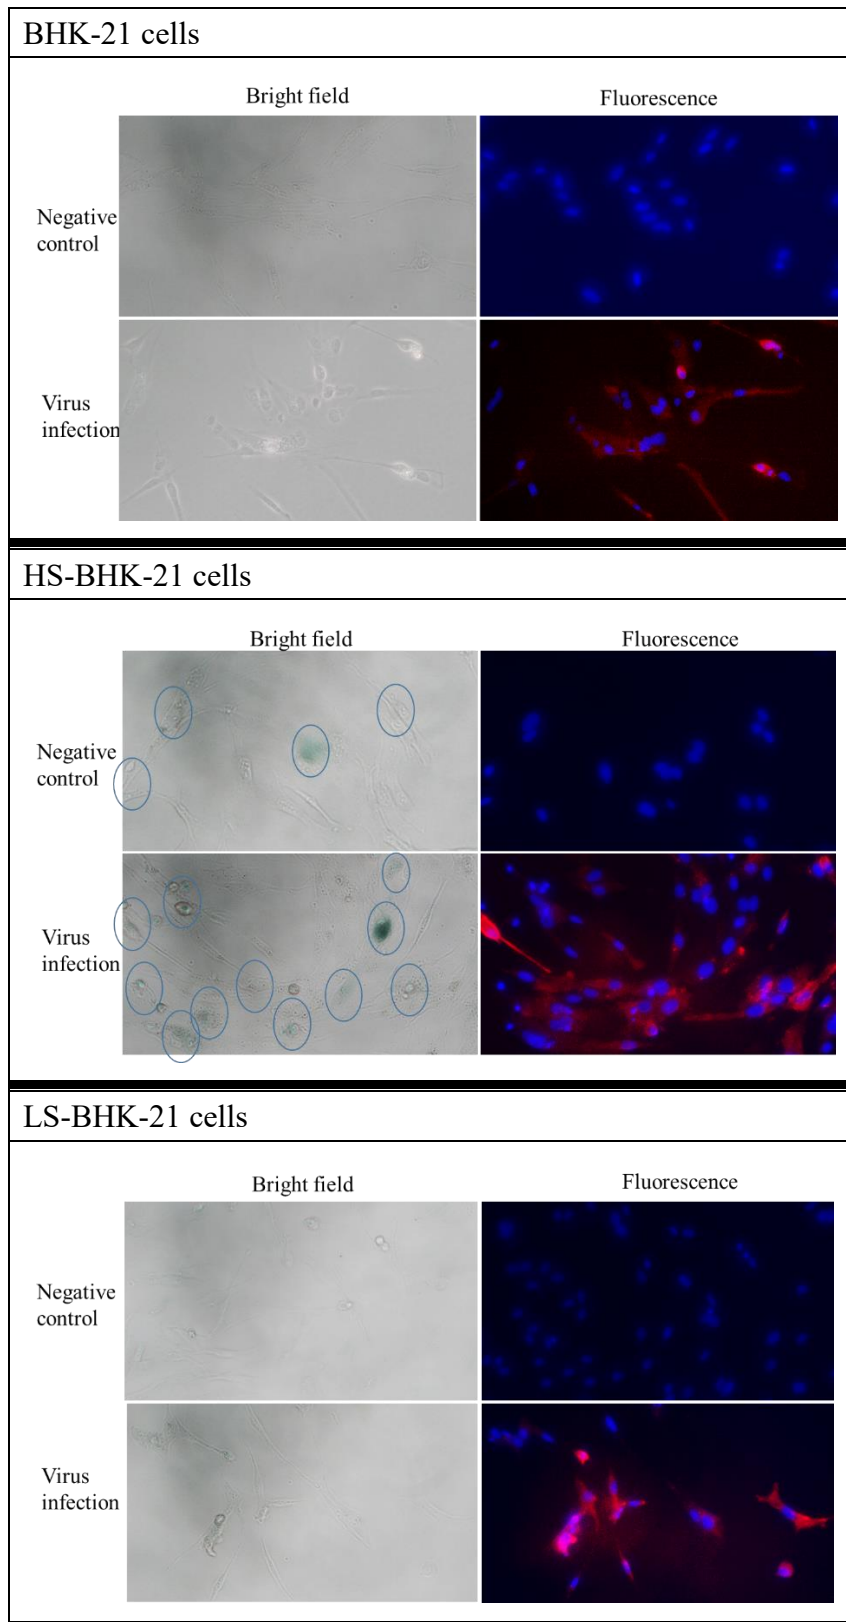

**Supplementary figure 3. The BEFV can infect all three BHK-21 clonal cells.** The BHK-21, HS-BHK-21, and LS-BHK-21 cells were infected by BEFV for 24hr incubation and were fixed. After SA- $\beta$ -gal staining, the samples were then probed with mouse anti-BEFV N antibody and further labeled by red-fluorescence conjugated goat anti-mouse IgG antibody (#12004158, BIO-RAD, California, USA). The cells nuclear were counterstained with DAPI. The SA- $\beta$ -gal staining positive cells were indicated with the blue circle.
