# Supplementary material for: A Senescence-Like Cellular Response Inhibits Bovine Ephemeral Fever Virus Proliferation
Source: Vaccines (Basel). 2021 Jun 4;9(6):601. doi: 10.3390/vaccines9060601 (PMC8227762; doi:10.3390/vaccines9060601)
Supplement: Supplementary file 1 [file vaccines-09-00601-s001.zip]

Archive with 4 entries (4 files):
- Supplementary figure1.pdf
- Supplementary figure2.pdf
- Supplementary figure3.pdf
- Supplementary table 1.xlsx
