# Supplementary material for: A Senescence-Like Cellular Response Inhibits Bovine Ephemeral Fever Virus Proliferation
Source: Vaccines (Basel). 2021 Jun 4;9(6):601. doi: 10.3390/vaccines9060601 (PMC8227762; doi:10.3390/vaccines9060601)
Supplement: Supplementary file 1 [file vaccines-09-00601-s001.zip › Supplementary table 1.xlsx]

## Sheet: SuppT2
Table S1. External senescence-related gene subsets added in the analysis
No.	Gene Subset Name	Reference	Genes
1	STRESS_GRANULES	https://msgp.pt/	ACTBL2,ACTR1A,ACTR1B,ADAR1,Ago1,Ago2,AKAP9,ALDH18A1,ANG,ANP32E,ANXA1,ANXA6,ANXA7,APEX1,APOBEC3G,ARPC1B,ATAD2,ATAD3A,ATP2C1,ATP5F1A,Atx2,Atxn2L,BAG3,BANF1,BRAT1,BRF1,BRF2,C9ORF72,CALML5,CALR3,CAP1,Caprin-1,CAPZA2,CARHSP1,CASC3,CBFB,CBX1,CCAR1,CCDC9B,CCT3,CCT6A,CD24,CDC5L,CDC73,CDK1,CDK2,CELF1,CERKL,CFL1,CHCHD3,CHORDC1,CHP1,CIRP,CIT,CLIC4,CNBP,CNN3,CNOT1,CORO1B,CPEB1,CPSF3,CPSF6,CPSF7,CRYAB,CSDE1,C…
2	human_cell_senescence_genes	https://genomics.senescence.info/cells/	TP53,TERF2,MAPK14,CDKN2A,CDKN1A,CCNE1,CCNA1,MAPKAPK5,CBX4,TXN,TBX2,STAT3,SRF,BMI1,MAP2K4,MAP2K6,MAP2K3,MAPK8,MAPK3,MAPK1,PRKCD,PML,OPA1,ATM,MDM2,CXCL8,IL6,IGFBP7,ID1,HRAS,H2AFX,POT1,SIRT1,KDM6B,PLA2R1,EZH2,E2F3,E2F1,CEBPB,CDKN2D,CDKN2B,CDKN1B,CDK6,CDK4,CDK2,CDC42,RBX1,CDC27,CDK1,MAML1,CD44,MAD2L1BP,MAP4K4,AIM2,RECQL4,ARHGAP18,KL,MAPKAPK2,AURKB,SLC16A7,CCNE2,HIST1H2BJ,HIST1H3F,CCNA2,MCM3AP,CDC16,T…
3	A_cell_aging_process_stimulated_in_response_to_cellular_stress	http://www.informatics.jax.org/go/term/GO:0090398	ACD,AGO1,AGO3,AGO4,ANAPC1,ANAPC10,ANAPC11,ANAPC2,ANAPC4,ANAPC5,ANAPC7,ASF1A,ATM,BMI1,CABIN1,CBX2,CBX4,CBX6,CBX8,CCNA1,CCNA2,CCNE1,CCNE2,CDC16,CDC23,CDC26,CDC27,CDK2,CDK4,CDK6,CDKN1A,CDKN1B,CDKN2A,CDKN2B,CDKN2C,CDKN2D,CEBPB,CXCL8,E2F1,E2F2,E2F3,EED,EHMT1,EHMT2,EP400,ERF,ETS1,ETS2,EZH2,FOS,FZR1,H1F0,H2AFB1,H2AFX,H2AFZ,H2BFS,H3F3A,HIRA,HIST1H1A,HIST1H1B,HIST1H1C,HIST1H1D,HIST1H1E,HIST1H2AB,HIST1H2AC…
4	REACTOME_CELLULAR_SENESCENCE	http://www.gsea-msigdb.org/gsea/msigdb/cards/REACTOME_CELLULAR_SENESCENCE	ACD,AGO1,AGO3,AGO4,ANAPC1,ANAPC10,ANAPC11,ANAPC15,ANAPC16,ANAPC2,ANAPC4,ANAPC5,ANAPC7,ASF1A,ATM,BMI1,CABIN1,CBX2,CBX4,CBX6,CBX8,CCNA1,CCNA2,CCNE1,CCNE2,CDC16,CDC23,CDC26,CDC27,CDK2,CDK4,CDK6,CDKN1A,CDKN1B,CDKN2A,CDKN2B,CDKN2C,CDKN2D,CEBPB,CXCL8,E2F1,E2F2,E2F3,EED,EHMT1,EHMT2,EP400,ERF,ETS1,ETS2,EZH2,FOS,FZR1,H1-0,H1-1,H1-2,H1-3,H1-4,H1-5,H2AB1,H2AC14,H2AC18,H2AC19,H2AC20,H2AC4,H2AC6,H2AC7,H2AC8,H…
5	REACTOME_SENESCENCE_ASSOCIATED_SECRETORY_PHENOTYPE_SASP_	http://www.gsea-msigdb.org/gsea/msigdb/cards/REACTOME_SENESCENCE_ASSOCIATED_SECRETORY_PHENOTYPE_SASP_	ANAPC1,ANAPC10,ANAPC11,ANAPC15,ANAPC16,ANAPC2,ANAPC4,ANAPC5,ANAPC7,CCNA1,CCNA2,CDC16,CDC23,CDC26,CDC27,CDK2,CDK4,CDK6,CDKN1A,CDKN1B,CDKN2A,CDKN2B,CDKN2C,CDKN2D,CEBPB,CXCL8,EHMT1,EHMT2,FOS,FZR1,H2AB1,H2AC14,H2AC18,H2AC19,H2AC20,H2AC4,H2AC6,H2AC7,H2AC8,H2AJ,H2AX,H2AZ1,H2AZ2,H2BC1,H2BC10,H2BC11,H2BC12,H2BC13,H2BC14,H2BC15,H2BC17,H2BC21,H2BC3,H2BC4,H2BC5,H2BC6,H2BC7,H2BC8,H2BC9,H2BS1,H2BU1,H3-3A,H3-3…
6	REACTOME_DNA_DAMAGE_TELOMERE_STRESS_INDUCED_SENESCENCE	https://www.gsea-msigdb.org/gsea/msigdb/cards/REACTOME_DNA_DAMAGE_TELOMERE_STRESS_INDUCED_SENESCENCE	ACD,ASF1A,ATM,CABIN1,CCNA1,CCNA2,CCNE1,CCNE2,CDK2,CDKN1A,CDKN1B,EP400,H1-0,H1-1,H1-2,H1-3,H1-4,H1-5,H2AB1,H2AC14,H2AC18,H2AC19,H2AC20,H2AC4,H2AC6,H2AC7,H2AC8,H2AJ,H2AX,H2AZ1,H2AZ2,H2BC1,H2BC10,H2BC11,H2BC12,H2BC13,H2BC14,H2BC15,H2BC17,H2BC21,H2BC3,H2BC4,H2BC5,H2BC6,H2BC7,H2BC8,H2BC9,H2BS1,H2BU1,H3-4,H4-16,H4C1,H4C11,H4C12,H4C13,H4C14,H4C15,H4C2,H4C3,H4C4,H4C5,H4C6,H4C8,H4C9,HIRA,HMGA1,HMGA2,KAT5,…
7	REACTOME_OXIDATIVE_STRESS_INDUCED_SENESCENCE	http://www.gsea-msigdb.org/gsea/msigdb/cards/REACTOME_OXIDATIVE_STRESS_INDUCED_SENESCENCE	AGO1,AGO3,AGO4,BMI1,CBX2,CBX4,CBX6,CBX8,CDK4,CDK6,CDKN2A,CDKN2B,CDKN2C,CDKN2D,E2F1,E2F2,E2F3,EED,EZH2,FOS,H2AB1,H2AC14,H2AC18,H2AC19,H2AC20,H2AC4,H2AC6,H2AC7,H2AC8,H2AJ,H2AX,H2AZ1,H2AZ2,H2BC1,H2BC10,H2BC11,H2BC12,H2BC13,H2BC14,H2BC15,H2BC17,H2BC21,H2BC3,H2BC4,H2BC5,H2BC6,H2BC7,H2BC8,H2BC9,H2BS1,H2BU1,H3-3A,H3-3B,H3C1,H3C10,H3C11,H3C12,H3C13,H3C14,H3C15,H3C2,H3C3,H3C4,H3C6,H3C7,H3C8,H4-16,H4C1,H4C…
8	FRIDMAN_SENESCENCE_UP	http://www.gsea-msigdb.org/gsea/msigdb/cards/FRIDMAN_SENESCENCE_UP	ALDH1A3,AOPEP,CCN2,CCND1,CD44,CDKN1A,CDKN1C,CDKN2A,CDKN2B,CDKN2D,CITED2,CLTB,COL1A2,CREG1,CRYAB,CXCL14,CYP1B1,EIF2S2,ESM1,F3,FILIP1L,FN1,GSN,GUK1,HBS1L,HPS5,HSPA2,HTATIP2,IFI16,IFNG,IGFBP1,IGFBP2,IGFBP3,IGFBP4,IGFBP5,IGFBP6,IGFBP7,IGSF3,ING1,IRF5,IRF7,ISG15,MAP1LC3B,MAP2K3,MDM2,MMP1,NDN,NME2,NRG1,OPTN,PEA15,RAB13,RAB31,RAB5B,RABGGTA,RAC1,RBL2,RGL2,RHOB,RRAS,S100A11,SERPINB2,SERPINE1,SMPD1,SMURF2,…
9	FRIDMAN_SENESCENCE_DN	http://www.gsea-msigdb.org/gsea/msigdb/cards/FRIDMAN_SENESCENCE_DN	ALDH1A1,BMI1,CCN4,CCNB1,CDC25B,CKS1BP7,COL3A1,E2F4,EGR1,ID1,LAMA1,LDB2,MARCKS
10	DEMAGALHAES_AGING_UP	http://www.gsea-msigdb.org/gsea/msigdb/cards/DEMAGALHAES_AGING_UP	ADIPOR2,ANXA3,ANXA5,APOD,B2M,C1QA,C1QB,C1QC,C3,C4A,CLIC4,CLU,CTSS,DCLK1,DERL1,EFCAB14,EFEMP1,FCGR2A,FCGR2B,GBP2,GFAP,GNS,GPNMB,GSTA1,H1-2,HBA1,HCST,HLA-G,IL33,JCHAIN,LAPTM5,LGALS3,LITAF,LYZ,MGST1,MPEG1,MSN,MT1F,NDRG1,NPC2,PCSK6,PSMD11,PTGES3,RASA3,RNF213,S100A4,S100A6,SERPING1,SGK1,SPP1,TMED10,TXNIP,VAT1,VWF
11	DEMAGALHAES_AGING_DN	http://www.gsea-msigdb.org/gsea/msigdb/cards/DEMAGALHAES_AGING_DN	ACSS2,ATP5MC3,CA4,CALB1,COL1A1,COL3A1,COL4A5,CX3CL1,DIABLO,FABP3,GHITM,NDUFB11,NREP,TFRC,UQCRFS1,UQCRQ
12	KAMMINGA_SENESCENCE	http://www.gsea-msigdb.org/gsea/msigdb/cards/KAMMINGA_SENESCENCE	ABHD8,ARHGAP28,ARHGEF10L,ARID1A,ATXN7L3B,CCAR1,CDYL2,CLK2,CPN1,DAGLB,DDX54,DHRSX,ELAVL1,EZH2,FHIT,FRS3,GNAO1,GRP,GTF2E1,HMGN1,ID1,KCP,KIAA0895L,KPNB1,KYNU,LIN54,LLPH,MKI67,NELFA,NOL9,PLEKHA7,PLEKHG2,PSD,QTRT1,RABAC1,SVOP,TCEA3,TGFB2,THBS4,VPS18
13	TANG_SENESCENCE_TP53_TARGETS_UP	http://www.gsea-msigdb.org/gsea/msigdb/cards/TANG_SENESCENCE_TP53_TARGETS_UP	A2M,ABCA8,ADAMTS5,ALDH3A2,APLP1,BACE1,C7,CCDC85B,CCND2,CDKN1A,CLIP1,COX7A1,GABBR2,GBX2,GMFG,HBG1,HBG2,HSD17B2,IVNS1ABP,LCAT,MMP3,NRG1,PSTPIP2,RAPGEF4,SIM2,SLC4A4,SNCA,TFAP4,TSPAN12,USF2,VAMP8,WFDC1,ZMAT3
14	TANG_SENESCENCE_TP53_TARGETS_DN	http://www.gsea-msigdb.org/gsea/msigdb/cards/TANG_SENESCENCE_TP53_TARGETS_DN	ADARB1,ADH1B,AURKB,BARD1,BIRC5,BUB1,CCNA2,CCNB2,CDC20,CDC25A,CDK1,CENPA,CENPE,CTH,DBF4,EXOSC9,EZH2,FBXO5,FOSL2,H2AC16,IGFBP5,IL12RB2,KIF11,KIF20A,KIF20B,KIF23,KIF4A,LMNB1,MAF,MAP1B,MRE11,NEK2,NRGN,NUP62,NUSAP1,OR1E1,PBK,PDP1,PLK4,PPL,PRC1,PTTG1,PTTG3P,QPCT,RACGAP1,SMC4,SPAG5,TCF4,TFAM,TK1,TOP2A,TPX2,TREM1,TTK,UBE2C,ZFY
15	WP_SENESCENCE_AND_AUTOPHAGY_IN_CANCER	http://www.gsea-msigdb.org/gsea/msigdb/cards/WP_SENESCENCE_AND_AUTOPHAGY_IN_CANCER	AKT1S1,AMBRA1,ATG10,ATG12,ATG13,ATG14,ATG16L1,ATG3,ATG5,ATG7,BCL2,BECN1,BMI1,BMP2,BRAF,CCL3,CD44,CDC25B,CDKN1A,CDKN1B,CDKN2A,CEBPB,COL10A1
16	GO_CELLULAR_SENESCENCE	http://www.gsea-msigdb.org/gsea/msigdb/cards/GO_CELLULAR_SENESCENCE	ABL1,AKT3,ARG2,ARNTL,B2M,BCL2L12,BCL6,BMPR1A,CALR,CDK6,CDKN1A,CDKN2A,CDKN2B,CGAS,ECRG4,EEF1E1,FBXO5,H2AX,HLA-G,HMGA1,HMGA2,HRAS,ID2,ING2,KAT6A,KIR2DL4,KRAS,MAGEA2,MAGEA2B,MAP2K1,MAP3K3,MAPK14,MAPKAPK5,MIR10A,MIR146A,MIR17,MIR188,MIR20B,MIR217,MIR22,MIR34A,MIR543,MIR590,NAMPT,NEK4,NEK6,NSMCE2,NUAK1,OPA1,PAWR,PLA2R1,PLK2,PML,PNPT1,PRKCD,PRKDC,PRMT6,RBL1,RSL1D1,SIRT1,SLC30A10,SMC5,SMC6,SRF,TBX2,TBX3…
17	GO_NEGATIVE_REGULATION_OF_CELLULAR_SENESCENCE	http://www.gsea-msigdb.org/gsea/msigdb/cards/GO_NEGATIVE_REGULATION_OF_CELLULAR_SENESCENCE	ABL1,AKT3,BCL2L12,BCL6,CDK6,FBXO5,HMGA2,MAP3K3,MIR17,MIR543,MIR590,NAMPT,PLK2,PRKDC,RBL1,SIRT1,SLC30A10,TERC,TERF2,TERT,TWIST1,YBX1,ZKSCAN3
18	GO_REPLICATIVE_SENESCENCE	http://www.gsea-msigdb.org/gsea/msigdb/cards/GO_REPLICATIVE_SENESCENCE	ATM,ATR,CDKN1A,CDKN2A,CHEK1,CHEK2,CTC1,MIR21,MME,PLA2R1,SERPINE1,TERT,TP53,WNT16
